# Supplementary material for: Spatial physical activity patterns among primary school children living in neighbourhoods of varying socioeconomic status: a cross-sectional study using accelerometry and Global Positioning System
Source: Springer Nature journal article supplement (doi:10.1186/s12889-016-2954-8), 2016-03-22
Supplement: MOESM1 [file 9751702]

# Multilevel analysis

## Model 1: Amount of MVPA (in minutes)

### Random effects:

|       | Chi.sq | Chi.DF | elim.num | p.value |
|-------|--------|--------|----------|---------|
| class | 0.10   | 1      | 1        | 0.749   |
| id    | 17.57  | 1      | kept     | 0.000   |

### Fixed effects:

|                | Sum Sq | Mean Sq | NumDF | DenDF   | F.value | elim.num | p.value |
|----------------|--------|---------|-------|---------|---------|----------|---------|
| income         | 2.80   | 0.56    | 5     | 49.20   | 0.40    | 1        | 0.844   |
| education      | 0.91   | 0.23    | 4     | 50.98   | 0.16    | 2        | 0.956   |
| nationality    | 3.07   | 1.02    | 3     | 55.86   | 0.74    | 3        | 0.534   |
| membership     | 0.41   | 0.41    | 1     | 58.96   | 0.29    | 4        | 0.590   |
| bmi            | 2.20   | 2.20    | 1     | 59.64   | 1.59    | 5        | 0.212   |
| language       | 3.40   | 1.70    | 2     | 61.53   | 1.23    | 6        | 0.300   |
| week day       | 12.04  | 2.01    | 6     | 2240.84 | 1.45    | 7        | 0.192   |
| location       | 786.24 | 112.32  | 7     | 2261.51 | 81.05   | kept     | <0.001  |
| sex            | 28.06  | 28.06   | 1     | 63.72   | 20.25   | kept     | 0.000   |
| wear time      | 17.81  | 17.81   | 1     | 70.79   | 12.85   | kept     | 0.001   |
| district       | 54.48  | 54.48   | 1     | 88.58   | 39.31   | kept     | <0.001  |
| temperature    | 8.42   | 8.42    | 1     | 62.80   | 6.08    | kept     | 0.016   |
| precipitation  | 9.56   | 9.56    | 1     | 62.46   | 6.90    | kept     | 0.011   |
| location:kreis | 136.99 | 19.57   | 7     | 2259.99 | 14.12   | kept     | <0.001  |

### Final model:

log(minutes of MVPA) ~ location + sex + wear time + district + temperature + precipitation +  
(1 | id) + location:district

## Model 2: Proportion of time in MVPA (in %)

### Random effects:

|       | Chi.sq | Chi.DF | elim.num | p.value |
|-------|--------|--------|----------|---------|
| class | 0.19   | 1      | 1        | 0.667   |
| id    | 45.99  | 1      | kept     | <0.001  |

### Fixed effects:

|                   | Sum Sq | Mean Sq | NumDF | DenDF   | F.value | elim.num | p.value |
|-------------------|--------|---------|-------|---------|---------|----------|---------|
| education         | 0.39   | 0.10    | 4     | 48.85   | 0.16    | 1        | 0.955   |
| membership        | 0.02   | 0.02    | 1     | 53.82   | 0.03    | 2        | 0.858   |
| nationality       | 0.64   | 0.21    | 3     | 54.46   | 0.36    | 3        | 0.779   |
| income            | 2.22   | 0.44    | 5     | 59.36   | 0.76    | 4        | 0.585   |
| bmi               | 0.89   | 0.89    | 1     | 63.11   | 1.51    | 5        | 0.224   |
| language          | 2.92   | 1.46    | 2     | 63.76   | 2.49    | 6        | 0.091   |
| temperature       | 2.20   | 2.20    | 1     | 65.35   | 3.74    | 7        | 0.057   |
| precipitation     | 2.00   | 2.00    | 1     | 67.04   | 3.40    | 8        | 0.070   |
| week day          | 11.52  | 1.92    | 6     | 2572.97 | 3.32    | kept     | 0.003   |
| location          | 315.58 | 45.08   | 7     | 2585.97 | 77.88   | kept     | <0.001  |
| sex               | 22.85  | 22.85   | 1     | 79.50   | 39.48   | kept     | <0.001  |
| district          | 6.19   | 6.19    | 1     | 111.52  | 10.69   | kept     | 0.001   |
| location:district | 32.48  | 4.64    | 7     | 2585.76 | 8.02    | kept     | <0.001  |

### Final model:

log(proportion of MVPA) ~ week day + location + sex + district + (1 | id) + location:district

## Model 3: Amount of SB (in minutes)

### Random effects:

|       | Chi.sq | Chi.DF | elim.num | p.value |
|-------|--------|--------|----------|---------|
| class | 1.12   | 1      | 1        | 0.291   |
| id    | 7.75   | 1      | kept     | 0.005   |

### Fixed effects:

|                   | Sum Sq  | Mean Sq | NumDF | DenDF   | F.value | elim.num | p.value |
|-------------------|---------|---------|-------|---------|---------|----------|---------|
| education         | 1.15    | 0.29    | 4     | 46.50   | 0.21    | 1        | 0.931   |
| membership        | 0.03    | 0.03    | 1     | 49.21   | 0.02    | 2        | 0.888   |
| nationality       | 1.95    | 0.65    | 3     | 50.28   | 0.48    | 3        | 0.697   |
| precipitation     | 0.26    | 0.26    | 1     | 53.71   | 0.19    | 4        | 0.665   |
| bmi               | 0.61    | 0.61    | 1     | 51.48   | 0.45    | 5        | 0.505   |
| language          | 4.39    | 2.20    | 2     | 53.70   | 1.63    | 6        | 0.206   |
| week day          | 44.96   | 7.49    | 6     | 2294.51 | 5.55    | kept     | 0.000   |
| location          | 1834.35 | 262.05  | 7     | 2309.31 | 193.91  | kept     | <0.001  |
| sex               | 7.20    | 7.20    | 1     | 57.17   | 5.33    | kept     | 0.025   |
| wear time         | 42.60   | 42.60   | 1     | 63.45   | 31.52   | kept     | 0.000   |
| district          | 9.42    | 9.42    | 1     | 89.77   | 6.97    | kept     | 0.010   |
| income            | 21.59   | 4.32    | 5     | 61.73   | 3.20    | kept     | 0.013   |
| temperature       | 5.75    | 5.75    | 1     | 62.26   | 4.25    | kept     | 0.043   |
| location:district | 61.11   | 8.73    | 7     | 2306.73 | 6.46    | kept     | 0.000   |

### Final model:

log(minutes of SB) ~ week day + location + sex + wear time + district + income +  
temperature + (1 | id) + location:district

## Model 4: Proportion of time in SB (in %)

### Random effects:

|       | Chi.sq | Chi.DF | elim.num | p.value |
|-------|--------|--------|----------|---------|
| class | 0.00   | 1      | 1        | 1.000   |
| id    | 55.71  | 1      | kept     | <0.001  |

### Fixed effects:

|                   | Sum Sq   | Mean Sq  | NumDF | DenDF   | F.value | elim.num | p.value |
|-------------------|----------|----------|-------|---------|---------|----------|---------|
| nationality       | 172.55   | 57.52    | 3     | 48.05   | 0.22    | 1        | 0.886   |
| temperature       | 54.99    | 54.99    | 1     | 51.98   | 0.21    | 2        | 0.652   |
| education         | 983.04   | 245.76   | 4     | 52.33   | 0.92    | 3        | 0.460   |
| membership        | 258.99   | 258.99   | 1     | 57.57   | 0.97    | 4        | 0.328   |
| language          | 609.40   | 304.70   | 2     | 57.29   | 1.14    | 5        | 0.326   |
| bmi               | 195.40   | 195.40   | 1     | 59.50   | 0.73    | 6        | 0.395   |
| income            | 2020.03  | 404.01   | 5     | 63.10   | 1.52    | 7        | 0.198   |
| week day          | 5796.34  | 966.06   | 6     | 2285.91 | 3.63    | kept     | 0.001   |
| location          | 82605.12 | 11800.73 | 7     | 2299.27 | 44.28   | kept     | <1e-07  |
| sex               | 1773.43  | 1773.43  | 1     | 66.13   | 6.66    | kept     | 0.012   |
| district          | 770.97   | 770.97   | 1     | 82.23   | 2.89    | kept     | 0.093   |
| precipitation     | 1269.20  | 1269.20  | 1     | 66.33   | 4.76    | kept     | 0.033   |
| location:district | 12023.93 | 1717.70  | 7     | 2298.87 | 6.45    | kept     | 0.000   |

### Final model:

$\log(\text{proportion of SB}) \sim \text{week day} + \text{location} + \text{sex} + \text{district} + \text{precipitation} + (1 | \text{id}) + \text{location:district}$
